# Supplementary material for: Stability-mediated epistasis constrains the evolution of an influenza protein
Source: eLife journal article supplement (doi:10.7554/elife.00631), 2013-05-14

Median and median-centered 80% credible intervals for dates of mutations  
on NP evolutionary path from Aichi/1968 to Brisbane/2007

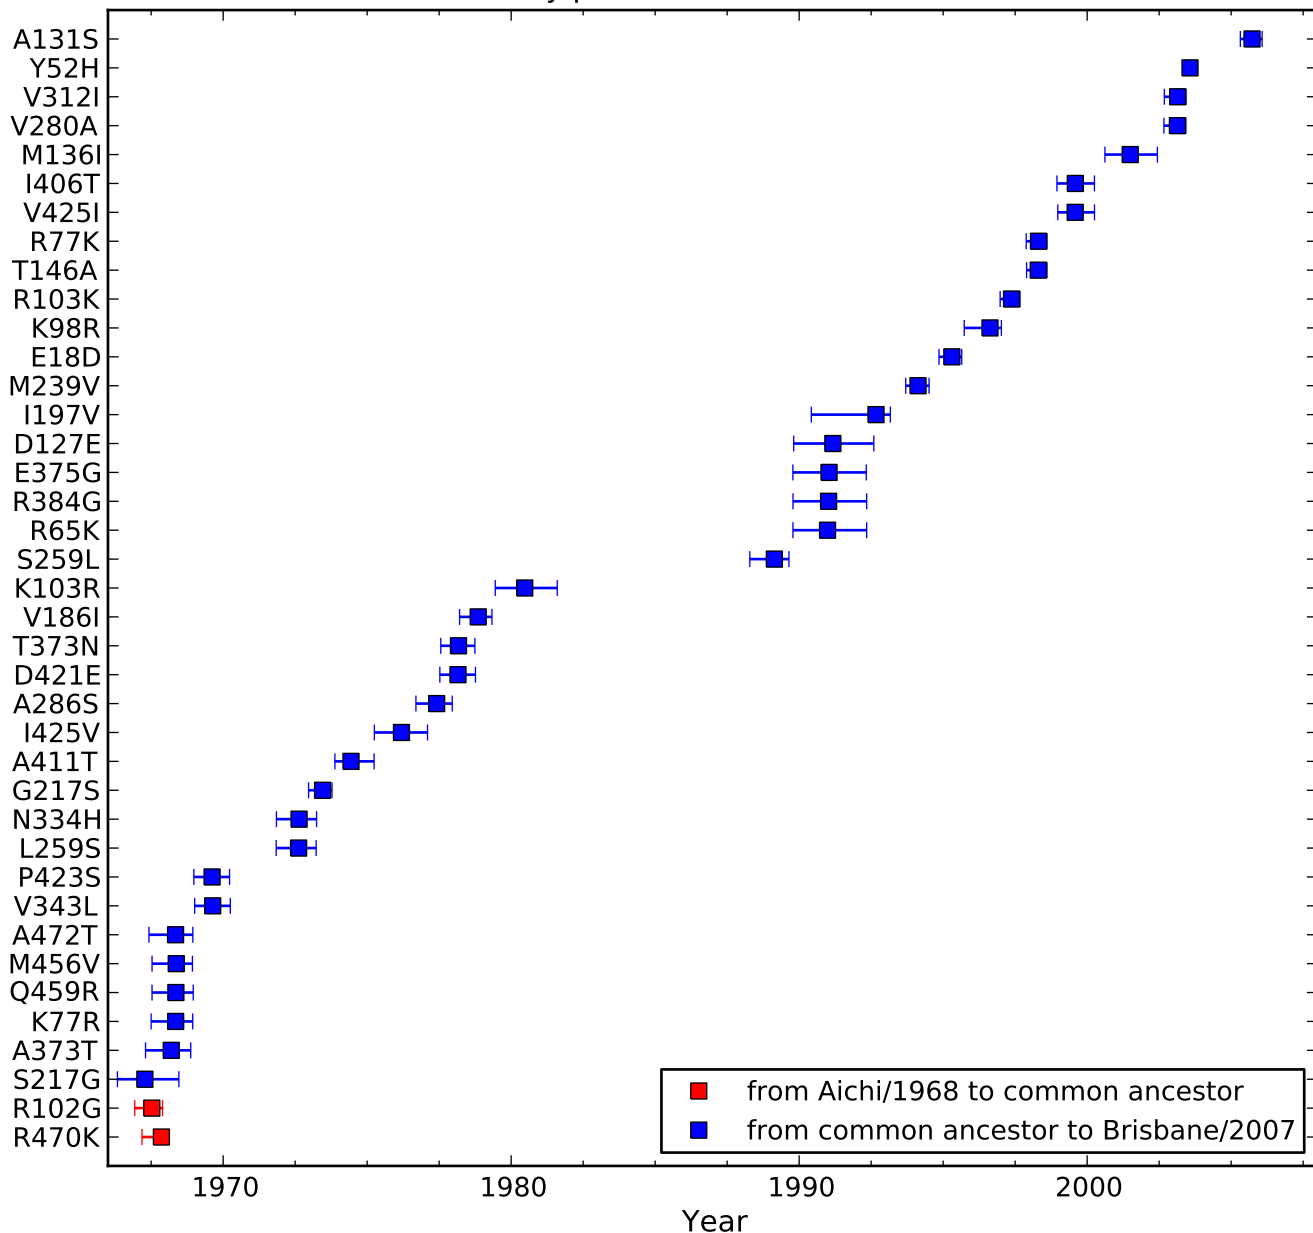

Supplement: fig2-code1 [file mutationdates.pdf › Figure_2-source_code_1/mutationdates.pdf]
