# Supplementary material for: Stability-mediated epistasis constrains the evolution of an influenza protein
Source: eLife. 2013 May 14;2:e00631. doi: 10.7554/eLife.00631 (PMC3654441; doi:10.7554/eLife.00631)
Supplement: Figure 3—source data 2. — The means and standard errors are computed from at least triplicate assays, and are reported standardized so the value for Aichi/1968 NP is at 1. The data are provided in a CSV file. DOI: http://dx.doi.org/10.7554/eLife.00631.010 [file elife00631s003.csv]

Table 3: Summary of viral growth data. Titers for each experiment standardized so that Aichi/1968 virus has a value of 1
Mutant	Mean	Standard Error
Step 10	0.7946	0.2476
Step 10-L259S	0.0209	0.009
Step 10-N334H	2.4491	0.2356
Step 12	1.0007	0.302
Step 20	1.7656	0.7123
Step 20-R384G	0.001	0.0005
Step 21	4.0848	0.9947
Step 21-E375G	7.5070	1.5464
Step 21-R384G	0.0149	0.0046
Step 21-R384G-E375G	5.3986	1.0242
Step 25	1.4819	0.3072
Step 34	0.694	0.1602
Step 35	0.778	0.0837
Step 35-V280A	1.0637	0.1443
Step 37	0.8534	0.0999
Step 39	0.703	0.2185
L259S	0.0009	0.0001
R384G	0.0003	0.0001
V280A	0.0542	0.0092
N334H	3.8195	0.9655
E375G	0.2641	0.063
M136I	2.2822	0.6357
L259S-N334H	2.063	0.1291
R384G-N334H	0.1203	0.0587
V280A-N334H	1.2699	0.0835
E375G-R384G	0.0007	0.0003
M136I-V280A	0.7022	0.1937
