# Supplementary material for: Stability-mediated epistasis constrains the evolution of an influenza protein
Source: eLife. 2013 May 14;2:e00631. doi: 10.7554/eLife.00631 (PMC3654441; doi:10.7554/eLife.00631)
Supplement: Figure 3—source data 3. — The data are provided in a CSV file. DOI: http://dx.doi.org/10.7554/eLife.00631.011 [file elife00631s004.csv]

Summary of NP activity data in different polymerase backgrounds. Data from each experiment normalized so that the Aichi/1968 NP has a value of 1
Mutant	Background	Mean	Standard Error
N334H	Nanchang/1995	1.0289	0.0619
M136I	Nanchang/1995	0.9824	0.0885
L259S	Nanchang/1995	0.1328	0.0128
R384G	Nanchang/1995	0.2098	0.0218
V280A	Nanchang/1995	0.2098	0.013
N334H	Aichi/1968	1.1424	0.1204
M136I	Aichi/1968	1.1652	0.1714
L259S	Aichi/1968	0.0899	0.0153
R384G	Aichi/1968	0.1705	0.0172
V280A	Aichi/1968	0.2329	0.0294
N334H	Brisbane/2007	1.0380	0.1412
M136I	Brisbane/2007	0.8651	0.0924
L259S	Brisbane/2007	0.5883	0.0959
R384G	Brisbane/2007	0.5210	0.0668
V280A	Brisbane/2007	0.5201	0.0303
