# Supplementary material for: Stability-mediated epistasis constrains the evolution of an influenza protein
Source: eLife. 2013 May 14;2:e00631. doi: 10.7554/eLife.00631 (PMC3654441; doi:10.7554/eLife.00631)
Supplement: Figure 6—source data 1. — DOI: http://dx.doi.org/10.7554/eLife.00631.019 [file elife00631s005.csv]

Summary of melting temperature and changes in melting temperature relative to mean of Aichi/1968
Mutant	Melting temperature	Change in temperature relative to mean of Aichi/1968
Aichi/1968 (1)	43.4
Aichi/1968 (2)	43.9
Aichi/1968 (3)	45.4
Aichi/1968 (Mean)	44.2	0
L259S	40.3	-3.9
L259S-N334H	44.6	0.4
R384G	39.4	-4.9
R384G-N334H	43.7	0.9
V280A	40.7	-3.6
V280A-N334H	46.2	3.5
N334H	48.7	4.4
M136I	44.8	0.6
E375G	43.2	-1
Step 1	43.4	-0.9
Step 2	44.7	0.5
Step 3	44.6	0.4
Step 8	44.3	0.1
Step 10	45.5	1.3
Step 10-L259S	39.9	-4.3
Step 10-N334H	50.7	6.5
Step 12	48.2	3.9
Step 13	45.1	0.9
Step 14	47.9	3.7
Step 15	47	2.7
Step 16	45.7	1.5
Step 18	45.9	1.6
Step 19	48.2	3.9
Step 20	46.4	2.2
Step 20-R384G	41.5	-2.7
Step 21	50.4	6.1
Step 21-R384G	45.5	1.3
Step 25	44.9	0.7
Step 26	45.1	0.9
Step 27	46.2	1.9
Step 28	47.5	3.3
Step 29	45.5	1.3
Step 30	45.4	1.1
Step 32	45.6	1.3
Step 34	44.6	0.3
Step 35	47.7	3.5
Step 35-V280A	43	-1.2
Step 37	44.9	0.7
Step 38	43.9	-0.4
Step 39	44	-0.2
