# Supplementary material for: Stability-mediated epistasis constrains the evolution of an influenza protein
Source: eLife. 2013 May 14;2:e00631. doi: 10.7554/eLife.00631 (PMC3654441; doi:10.7554/eLife.00631)
Supplement: Figure 7—source data 1. — The data are provided in CSV format. [file elife00631s006.csv]

Summary of melting temperature, normalized NP activity data, and normalized viral growth data
Mutant	Melting temperature	NP activity data	NP activity data standard error	Viral growth data	viral growth data standard error
Aichi/1968 (Mean)	44.2	1	0	1	0
L259S	40.3	0.1328	0.0128	0.0009	0.0001
L259S-N334H	44.6	0.795	0.0977	2.063	0.1291
R384G	39.4	0.2098	0.0218	0.0003	0.0001
R384G-N334H	43.7	0.8174	0.0494	0.1203	0.0587
V280A	40.7	0.2098	0.013	0.0542	0.0092
V280A-N334H	46.2	0.9236	0.0381	1.2699	0.0835
N334H	48.7	1.0289	0.0619	3.8195	0.9655
M136I	44.8	0.9824	0.0885	2.2822	0.6357
E375G	43.2	0.814	0.0761	0.2641	0.063
Step 1	43.4	0.9224	0.0778	not measured
Step 2	44.7	1.0712	0.0575	not measured
Step 3	44.6	0.9347	0.0533	not measured
Step 8	44.3	0.8838	0.1463	not measured
Step 10	45.5	1.0352	0.087	0.7946	0.2476
Step 10-L259S	39.9	0.4479	0.0367	0.0209	0.009
Step 10-N334H	50.7	0.8544	0.0357	2.4491	0.2356
Step 12	48.2	0.9978	0.0874	1.0007	0.302
Step 13	45.1	0.9182	0.0445	not measured
Step 14	47.9	0.9007	0.0232	not measured
Step 15	47	0.7612	0.067	not measured
Step 16	45.7	0.7981	0.0408	not measured
Step 18	45.9	0.7619	0.0803	not measured
Step 19	48.2	0.7338	0.0171	not measured
Step 20	46.4	0.8389	0.0701	1.7656	0.7123
Step 20-R384G	41.5	0.4658	0.0508	0.001	0.0005
Step 21	50.4	0.8524	0.0662	4.0848	0.9947
Step 21-R384G	45.5	0.8881	0.0143	0.0149	0.0046
Step 25	44.9	0.7433	0.0824	1.4819	1.0242
Step 26	45.1	0.7484	0.0576	not measured	0.3072
Step 27	46.2	0.7169	0.0375	not measured
Step 28	47.5	0.9448	0.0277	not measured
Step 29	45.5	0.8499	0.052	not measured
Step 30	45.4	0.8127	0.0599	not measured
Step 32	45.6	0.7908	0.0367	not measured
Step 34	44.6	0.9069	0.1069	0.694	0.1602
Step 35	47.7	0.908	0.0705	0.778	0.0837
Step 35-V280A	43	0.782	0.0381	1.0637	0.1443
Step 37	44.9	0.7648	0.0554	0.8534	0.0999
Step 38	43.9	0.7292	0.0459	not measured
Step 39	44	0.7693	0.0792	0.703	0.2185
