# Supplementary figures and images for: Stability-mediated epistasis constrains the evolution of an influenza protein
Source: eLife journal article supplement (doi:10.7554/elife.00631), 2013-05-14

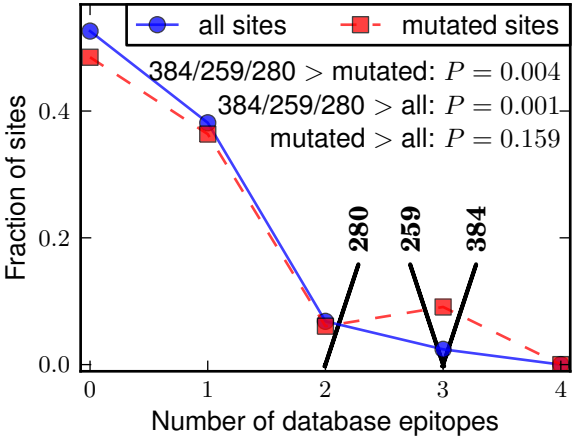

Supplement: fig8-code1 [file epitopedensity_database_384-259-280.pdf › Figure_8-source_code_1/plots/epitopedensity_database_384-259-280.pdf]

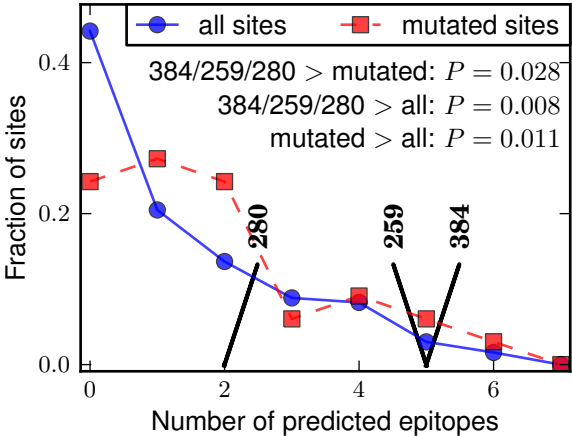

Supplement: fig8-code1 [file epitopedensity_predicted_384-259-280.pdf › Figure_8-source_code_1/plots/epitopedensity_predicted_384-259-280.pdf]

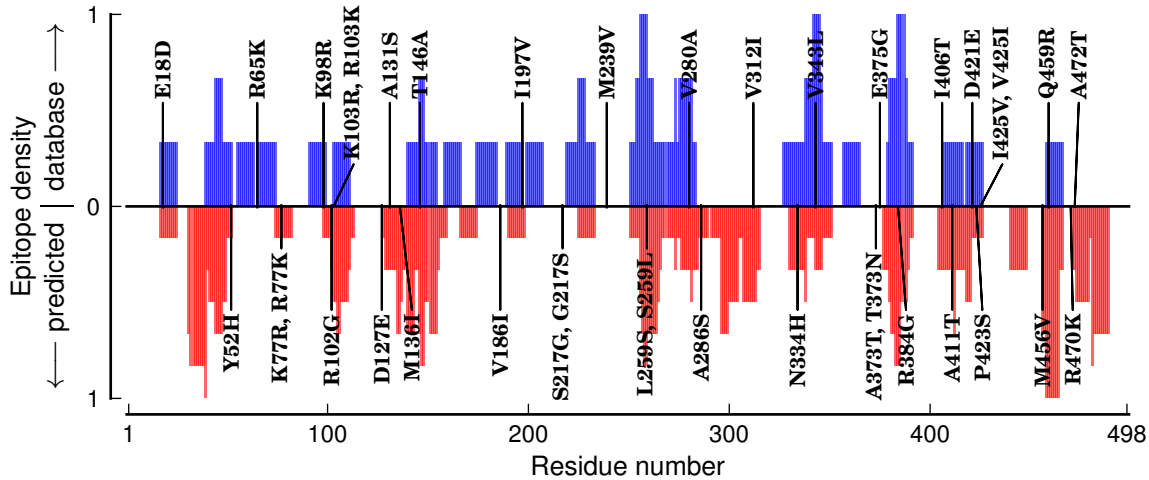

Supplement: fig8-code1 [file mapped_epitopes.pdf › Figure_8-source_code_1/plots/mapped_epitopes.pdf]

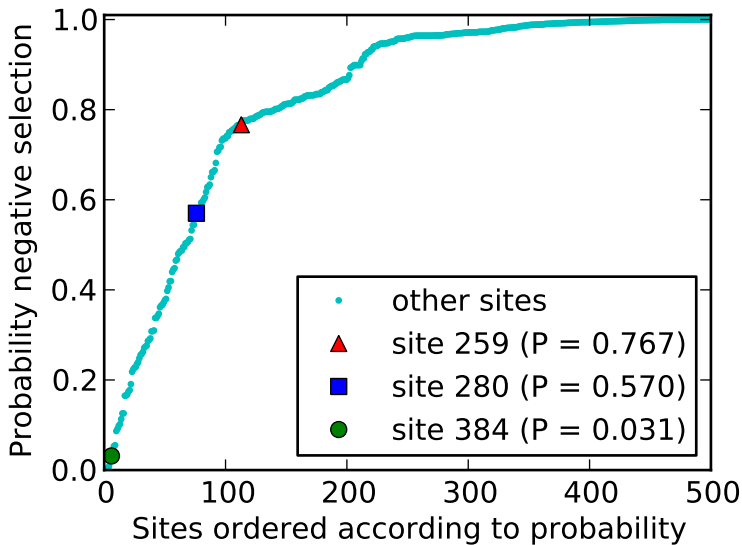

Supplement: fig8-code2 [file elife-00631-fig8-code2-v1-download.zip]

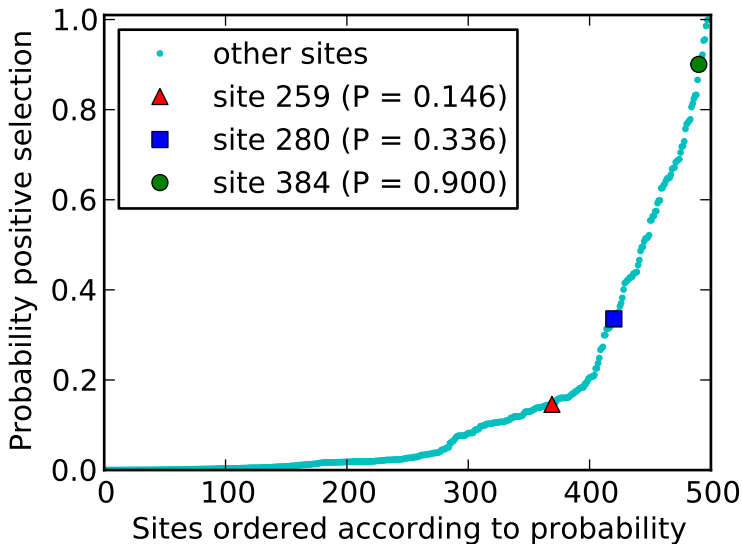

Supplement: fig8-code2 [file elife-00631-fig8-code2-v1-download.zip]
